# Supplementary material for: Characteristics and Service Utilization by Complex Chronic and Advanced Chronic Patients in Catalonia: A Retrospective Seven-Year Cohort-Based Study of an Implemented Chronic Care Program
Source: MDPI journal article supplement (doi:10.3390/ijerph18189473), 2021-09-08
Supplement: s1 [file s1]

**Supplementary File for the submission by Santaegència et al. “Characteristics and Service Utilization by Complex Chronic and Advanced Chronic Patients in Catalonia: A Retrospective Seven-year Cohort-Based Study of an Implemented Chronic Care Program.”**

## Supplementary Tables

| Table S1. Types of complexity and criteria for the identification of complex chronic patients |                                                                                                                                                                                                                                                                                                                                                                                       |                                                                                                                                                                                                                                                                                                                                                                                                                                                                                                                                                           |
|-----------------------------------------------------------------------------------------------|---------------------------------------------------------------------------------------------------------------------------------------------------------------------------------------------------------------------------------------------------------------------------------------------------------------------------------------------------------------------------------------|-----------------------------------------------------------------------------------------------------------------------------------------------------------------------------------------------------------------------------------------------------------------------------------------------------------------------------------------------------------------------------------------------------------------------------------------------------------------------------------------------------------------------------------------------------------|
| Type of Complexity                                                                            | Definition                                                                                                                                                                                                                                                                                                                                                                            | Criteria <sup>a</sup>                                                                                                                                                                                                                                                                                                                                                                                                                                                                                                                                     |
| <b>Clinical Complexity</b>                                                                    | <p>Interaction between multiple disease-related factors.<br/>E.g. Diagnosis, severity, symptoms with difficult control, multimorbidity, and associated disability degree.</p> <p>For healthcare professionals, disease-related factors usually influence two interrelated conditions, difficulty for accurate diagnosis and for decision-making, determining clinical complexity.</p> | <ul style="list-style-type: none"> <li>▪ Multimorbidity: Single Chronic severe or progressive pathology. Rare diseases.</li> <li>▪ Dynamic evolution.</li> <li>▪ Geriatric syndromes with severity/progression criteria (e.g., polypharmacy, cognitive determinant, and frailty).</li> <li>▪ Intense, persistent and refractory symptoms.</li> <li>▪ High services use and healthcare resource consumption. High probability of decompensation.</li> <li>▪ Classification within the 5% higher risk according to the Adjusted morbidity group.</li> </ul> |
| <b>Contextual complexity</b><br>(social, psychosocial and familiar)                           | <p>Disease-generated social needs and psychosocial discomfort that may worsen or hamper management of clinical complexity.</p> <p>Risky social function (i.e., dysfunctional) to meet health needs within the same social support network due to the impact of social and psychosocial risk factors.</p>                                                                              | <p>Risky or dysfunctional social situation to meet needs in one or more of the following areas:</p> <ul style="list-style-type: none"> <li>▪ Organization of care.</li> <li>▪ Family unit and/or caregivers.</li> <li>▪ Family cohesion and affective climate.</li> <li>▪ Structural, safety, comfort and privacy conditions.</li> <li>▪ Social and setting network.</li> </ul>                                                                                                                                                                           |
| <b>Complexity associated with the healthcare system</b>                                       | <p>Given the multiple possible responses to the complexity challenge, paradoxically, the system may become a source of complexity, not necessarily solved by increased resources and services. Increased services and healthcare professionals may lead to complexity due to the generation of multiple possible</p>                                                                  | <ul style="list-style-type: none"> <li>▪ Benefit of multidisciplinary management. Need to access different services.</li> <li>▪ Uncertainty in decision-making and doubts regarding management. Discrepancies among different professionals or teams regarding clinical management.</li> </ul>                                                                                                                                                                                                                                                            |

|                                                                                                                                                                                                                                                                                                                                                                                                                                                                                |                                                                                       |                                          |
|--------------------------------------------------------------------------------------------------------------------------------------------------------------------------------------------------------------------------------------------------------------------------------------------------------------------------------------------------------------------------------------------------------------------------------------------------------------------------------|---------------------------------------------------------------------------------------|------------------------------------------|
|                                                                                                                                                                                                                                                                                                                                                                                                                                                                                | pathways, uncoordinated responses, duplicities, and gaps in the healthcare continuum. | ▪ Benefit of integrated care strategies. |
| <p><sup>a</sup>unequivocal guidelines regarding criteria, their number, or combinations that need to be met to be considered a chronic complex patient have not been established. Healthcare professionals may deem management of a case as particularly difficult due to a sufficient number of criteria met, validate them clinically, and identify the patient as chronic complex. A person failing to meet any of the criteria is unlikely to have complex care needs.</p> |                                                                                       |                                          |

## Supplementary Figures

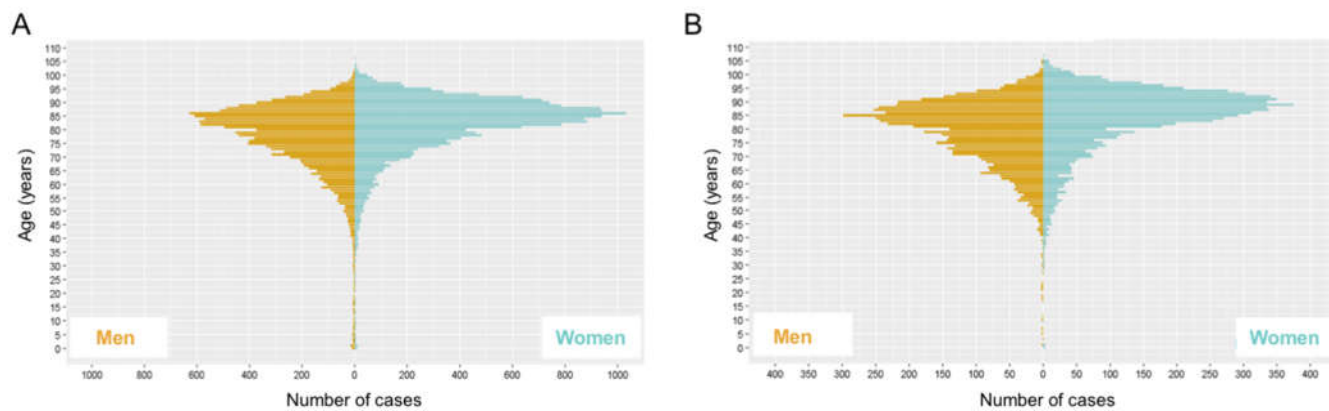

**Figure S1.** Age and sex distribution of prevalent cases of (A) CCPs and (B) ACPs in 2019.

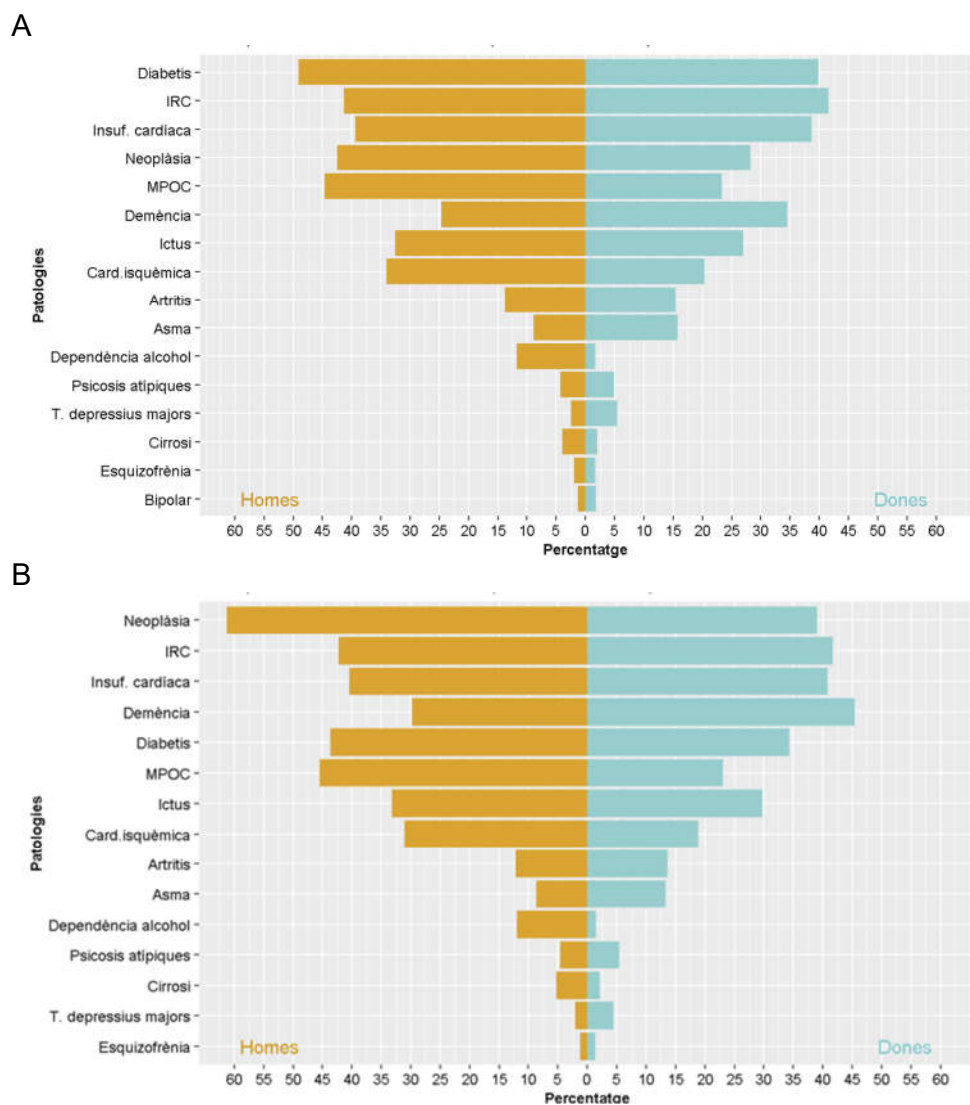

**Figure S2.** Main comorbidities of prevalent cases of (A) complex chronic (CCP) and (B) advanced chronic (ACP) patients by sex. Year 2019.
